# Supplementary material for: A highly selective ratiometric detection of F−based on excited-state intramolecular proton-transfer (imidazole) materials
Source: Royal Society of Chemistry journal article supplement (doi:10.1039/c4tc01711k), 2014-08-21

## Supporting Information

### A Highly Selective Ratiometric Detection of F<sup>-</sup> based on Excited-State Intramolecular Proton-Transfer (Imidazole) Materials

Kunchala Dhanunjayarao, Vanga Mukundam, and Krishnan Venkatasubbaiah\*

School of Chemical Sciences

National Institute of Science Education and Research (NISER)  
Institute of Physics Campus, Bhubaneswar-751005, Orissa (India).

Fax: (+) 091-674-2302436

E-mail: krishv@niser.ac.in

Compound 1 <sup>1</sup>H NMR

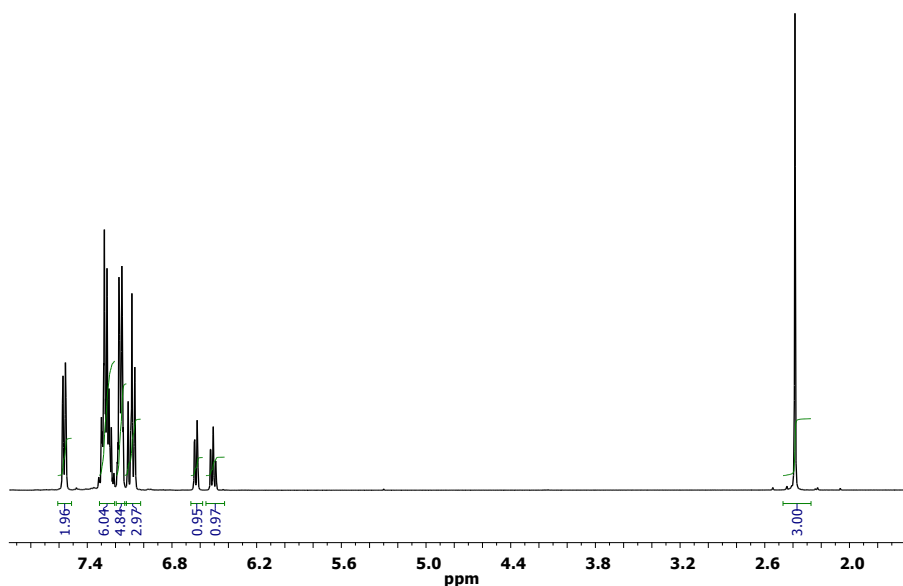

# Compound 1 <sup>13</sup>C NMR

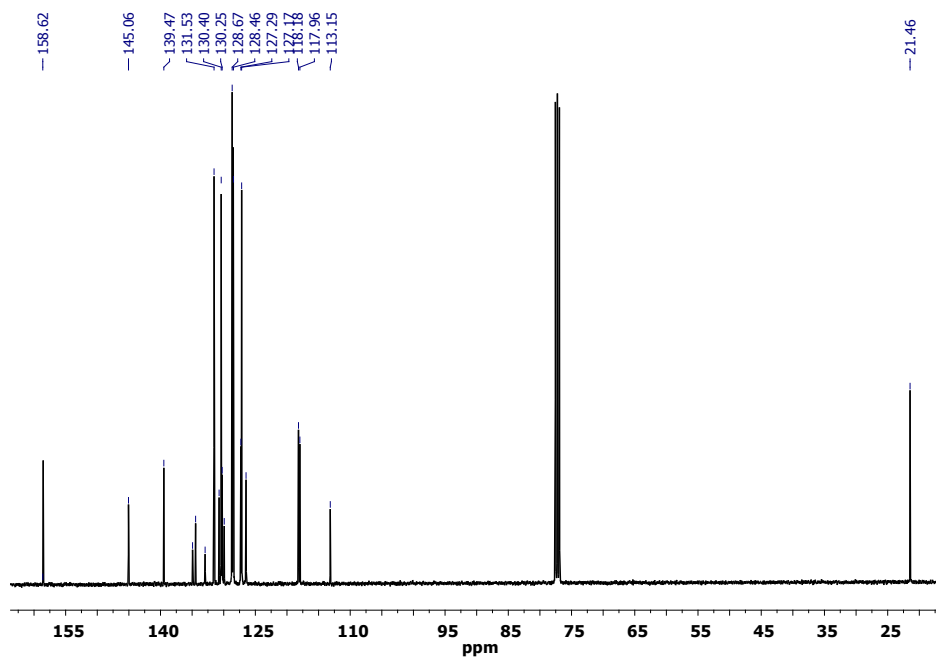

# Compound 1 HRMS

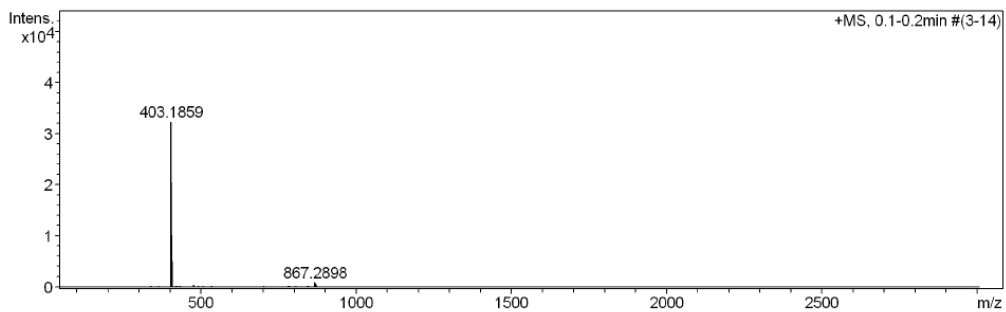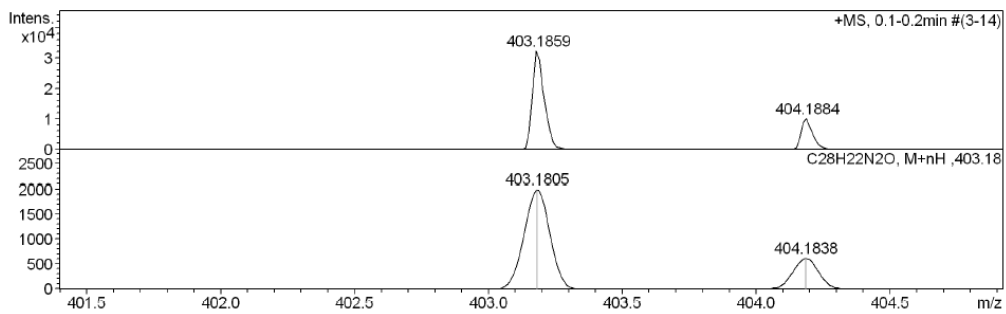

### Compound 2 $^1\text{H}$ NMR

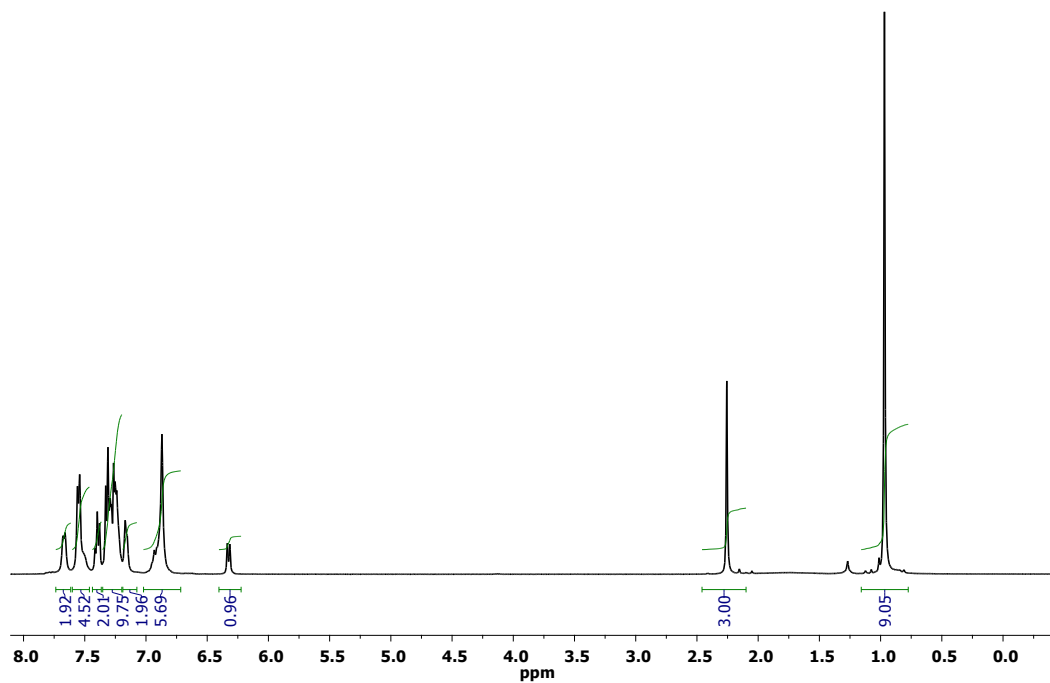

### Compound 2 $^{13}\text{C}$ NMR

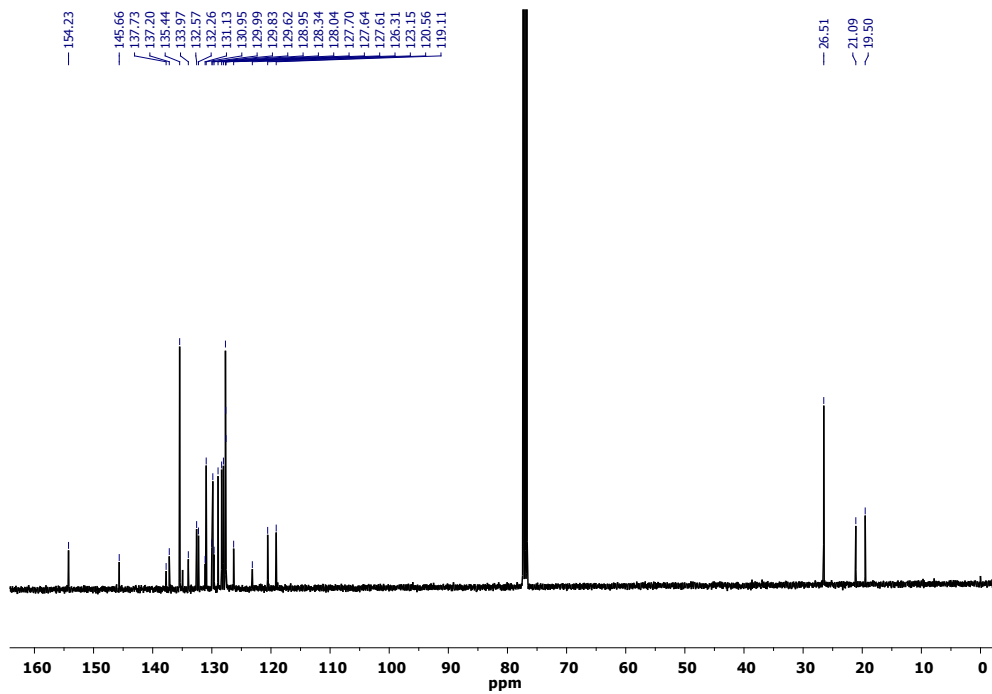

# Compound 2 <sup>29</sup>Si NMR

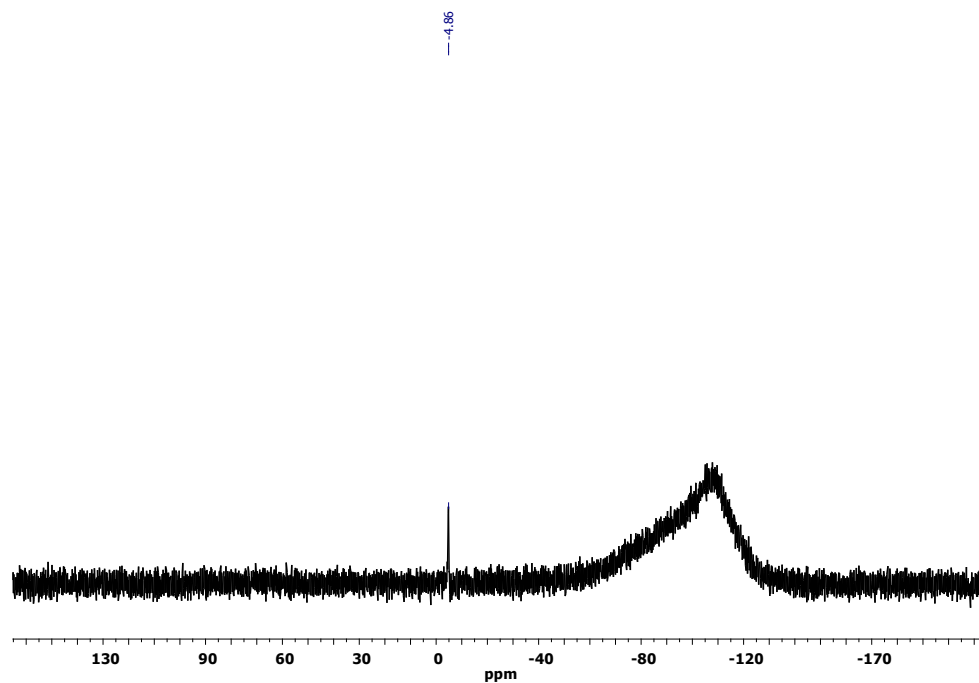

# Compound 2 HRMS

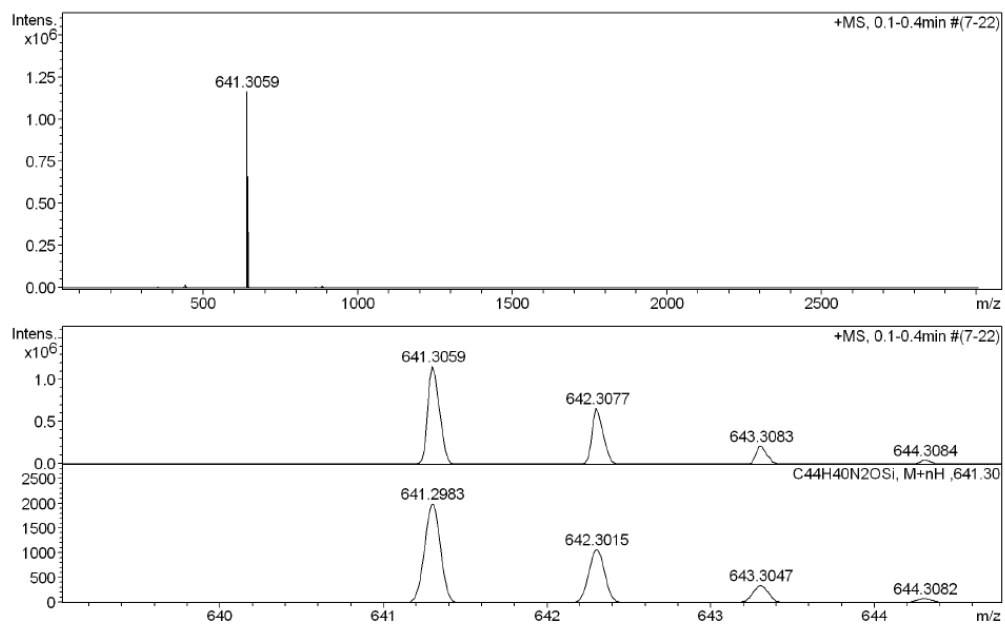

Supplement: c4tc01711k1.pdf [file c4tc01711k1.pdf]
